# Supplementary material
Source: Springer Nature journal article supplement (https://www.springermedizin.de/resource/supplementary/13012_2012_571_MOESM6_ESM.pdf/9630418)
Supplement: MOESM6 [file 9630418]

Sketching and brainstorming

Strategy A version 1

User testing

Advisory  
group  
feedback

Analysis of findings & feedback  
Sketching and brainstorming

Strategy A version 2

User testing

Advisory  
group  
feedback

Analysis of findings & feedback  
Sketching and brainstorming

Strategy A version 3,  
for implementation and  
RCT evaluation

*Number of iterations  
may be more or less  
than 3, depending  
on nature of findings  
and feedback*
